# Supplementary material
Source: PubMed Central journal article supplement (PMC6245664)

## Supplementary Information

**Table S1.** Methylation specific PCR primers for amplification of bisulfite converted EST cell line genomic DNA.

| Gene          | Sequence                                                                                  | Product Length |
|---------------|-------------------------------------------------------------------------------------------|----------------|
| RARB Promoter | fwd: biotin-C6-5'-TTTATGCGAGTTGTTTGAGGATTGGG-3'<br>rev: 5'-CTTACAAAAACCTTCCGAATACGTTCC-3' | 113 bp         |
| KIT Promoter  | fwd: biotin-C6-5'-AGGAGGGGTTGTTGTTTCGTTCG-3'<br>rev: 5'-CGCGATAACTACGATAAAATCCG-3'        | 111 bp         |

**Table S2.** List of ssDNA probes used for GMR methylation profiling.

| Gene          | Sequence*                                                                                                         |
|---------------|-------------------------------------------------------------------------------------------------------------------|
| RARB Promoter | Meth: NH2-C6-5'-(9xT) <b>GCTCGCGTTCTCGACATCCCAATC</b><br>uMeth: NH2-C6-5'-(9xT) AATCACTCACATTCTCAACATCCCAATCCTCAA |
| KIT Promoter  | Meth: NH2-C6-5'-(9xT) <b>GAACGCGACAAAACCGAACC-3'</b><br>uMeth: NH2-C6-5'-(9xT) ACAAACACAACAAAACCAAACCCC-3'        |

\*All probes are amino-labelled to bind to GMR sensor surfaces.

**Table S3.** Results of linear regression of  $\Delta T_m$  versus initial methylation percentage for annealing temperatures 59 °C, 62 °C, and 64 °C.

| $T_a$ [°C] | Intercept  | Slope     | $R^2$ |
|------------|------------|-----------|-------|
| 59         | 11(±4)     | 6(±2)     | 0.78  |
| 62         | 16.6(±0.3) | 8.7(±0.4) | 0.99  |
| 64         | 20(±1)     | 8(±1)     | 0.96  |

**Figure S1.** Regression analysis of methylation density versus  $\Delta T_m$  for all three annealing temperatures. Parameters for regressions are given in Table S3.

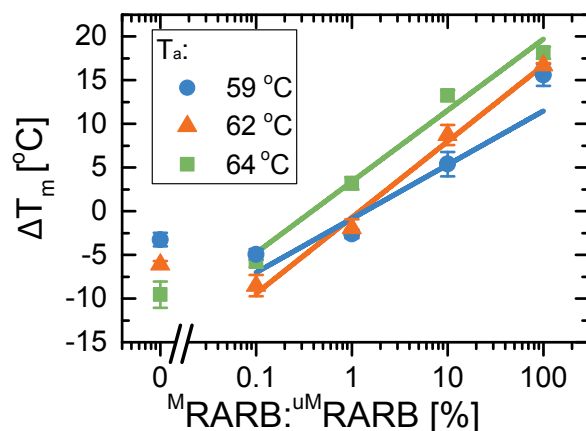

**Figure S2.** EvaGreen melt analysis of singleplex MSP for RARB and KIT, each with  $T_m = 81\text{ }^\circ\text{C}$ .

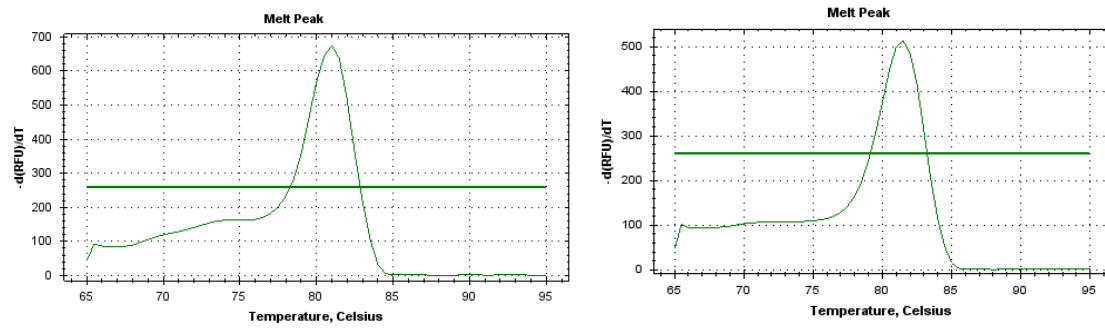

Supplement: NIHMS1511107-supplement-1.pdf [file NIHMS1511107-supplement-1.pdf]
